# Supplementary material
Source: publisher figshare collection journal article supplement (https://tandf.figshare.com/articles/dataset/_/963487)
Supplement: Supplementary file 2 [file 3]

# Smooth Scalar-on-Image Regression via Spatial Bayesian Variable Selection: Supplement B

By: Jeff Goldsmith, Lei Huang, Ciprian Crainiceanu

## B R Code for Single-site Sampler

The following code implements the Gibbs sampler used for two-dimensional scalar-on-image regression; straightforward extensions allow for higher dimensions. In this code, the quantities  $N1$  and  $N2$  are the dimensions of the image predictors;  $\mathbf{x}\beta$  is the vector of dot products  $\mathbf{X} \cdot \beta$  and is initialized to 0, as is  $\beta$ ; and  $\text{sigeps.inv}$  and  $\text{sigbeta.inv}$  are  $\frac{1}{\sigma_\epsilon^2}$  and  $\frac{1}{\sigma_\beta^2}$ , respectively. This code sweeps over all image locations, at each point making a Bernoulli choice between a zero and nonzero coefficient based on the prior information and the relative impact on the likelihood comparing a zero to a nonzero coefficient. Coefficients  $\alpha$  for fixed effects  $\text{FixEf}$  are updated after the sweep over image locations.

```
for(i in N1:1){
  for(j in 1:N2){
    # define delta neighborhood
    delta = cbind(c(i-1, i+1, i,i), c(j,j, j-1, j+1))
    delta = replace(delta, which(delta<=0), NA)
    delta[,1] = replace(delta[,1], which(delta[,1]>N1), NA)
    delta[,2] = replace(delta[,2], which(delta[,2]>N2), NA)
    dl = sum(complete.cases(delta))
    Xl=X[i,j,]
    xbeta0 = xbeta - betaHat[i,j]*Xl;   txbeta0 = t(xbeta0)

    # generate nonzero coefficient
    betabar = mean(betaHat[delta], na.rm=TRUE)
    Sigl = 1/(sigeps.inv * InProd[i,j] + dl * sigbeta.inv)
    Mul = Sigl * ( sigeps.inv * (tY - t(FixEf**alpha) - txbeta0)**Xl
                  + dl * sigbeta.inv * betabar    )
    betaStar = rnorm(1, Mul, sqrt(Sigl))

    xbetal = xbeta0+Xl*betaStar; txbetal=t(xbetal)

    # compute posterior probability g_l
    IND = sum(1-2*z[delta], na.rm=TRUE)
    g = sqrt(2*pi*SigB/dl)*exp((-0.5*sigeps.inv)*(txbeta0**xbeta0
      + 2*(txbetal-txbeta0)**(Y+FixEf**alpha)
      - txbetal**xbetal) + .5*sigbeta.inv*dl*(betaStar-betabar)^2
      - A[i,j] + b*IND )
    ppos = 1/(1+g)

    # Bernoulli choice based on posterior probability
    if(rbinom(1, 1, ppos)==1) {z[i,j] = 1; betaHat[i,j] = betaStar}
    else {z[i,j] = betaHat[i,j] = 0}
```

```
# update X * Beta based on current iteration
xbeta = xbeta0 + betaHat[i,j]*Xl
}
}
```
