# Supplementary material
Source: publisher figshare collection journal article supplement (https://tandf.figshare.com/articles/dataset/_/963487)
Supplement: Supplementary file 3 [file 3]

Smooth Scalar-on-Image Regression via  
Spatial Bayesian Variable Selection: Supplement F  
By: Jeff Goldsmith, Lei Huang, Ciprian Crainiceanu

This supplement contains an embedded 3D graphic of the estimated coefficient function for simulations with registration errors. The graphic depends on the use of Adobe Acrobat, version 9 or later.
