# Supplementary material
Source: publisher figshare collection journal article supplement (https://tandf.figshare.com/articles/dataset/_/963487)
Supplement: Supplementary file 4 [file 3]

# Smooth Scalar-on-Image Regression via Spatial Bayesian Variable Selection: Supplement E

By: Jeff Goldsmith, Lei Huang, Ciprian Crainiceanu

This supplement contains an embedded 3D graphic of the estimated coefficient function using the proposed method for simulations with a large, homogenous true predictive region. The graphic depends on the use of Adobe Acrobat, version 9 or later.
