# Supplementary material
Source: publisher figshare collection journal article supplement (https://tandf.figshare.com/articles/dataset/_/963487)
Supplement: Supplementary file 5 [file 3]

# Smooth Scalar-on-Image Regression via Spatial Bayesian Variable Selection: Supplement A

By: Jeff Goldsmith, Lei Huang, Ciprian Crainiceanu

## A Theoretical Results

Recall our previous notation that  $\delta_l$  is the neighborhood consisting of all image locations sharing a face (but not a corner) with location  $l$ , and that  $d_l = |\delta_l|$  where  $|\cdot|$  denotes the cardinality of a set.

**Theorem 1.** *If there exists at least one location  $l$  for which  $\gamma_l = 0$ , then  $p(\beta \mid \gamma)$  is proper.*

*Proof.* Define sets  $L = \{l : \gamma_l = 1\}$  and  $L^C = \{l : \gamma_l = 0\}$  that partition image locations in predictive and non-predictive locations, and assume that  $L^C$  is non-empty. Let  $\beta_L$  and  $\beta_{L^C}$  be the coefficient image at the predictive and non-predictive locations, respectively; also let  $\underline{\beta}_L$  be the regression coefficients of predictive locations expressed as a vector.

For  $l \in L^C$ ,  $[\beta_l \mid \gamma_l = 0] \sim \delta(0)$  where  $\delta(0)$  is the Dirac delta function. For  $l \in L$ ,  $[\beta_l \mid \beta_{-l}, \gamma_{-l}] \sim N\left[\frac{\sum_{l' \in \delta_l} \beta_{l'} \gamma_{l'}}{d_l}, \sigma_{\beta}^2 / d_l\right]$ . Note that  $\frac{\sum_{l' \in \delta_l} \beta_{l'} \gamma_{l'}}{d_l} = \frac{\sum_{l' \in (\delta_l \cap L)} \beta_{l'}}{d_l}$  so that the distribution depends only on elements of  $\beta_L$ . Defining  $b_{ll'} = \frac{1}{d_l}$ , we have  $\frac{\sum_{l' \in (\delta_l \cap L)} \beta_{l'}}{d_l} = \sum_{l' \in (\delta_l \cap L)} b_{ll'} \beta_{l'}$ . Following Brook's lemma (Brook, 1964), this prior specification for  $[\beta_l \mid \beta_{-l}, \gamma_{-l}]$  results in the joint density  $f(\underline{\beta}_L) \propto \exp\left[\frac{-1}{2} \underline{\beta}_L^T D^{-1} (I - B) \underline{\beta}_L\right]$  where  $D$  and  $B$  are square matrices of size  $|L| \times |L|$  whose rows and columns correspond to the location ordering of  $\underline{\beta}_L$ .  $D$  is a diagonal matrix with entries  $D_{ll} = \sigma_{\beta}^2 / d_l$  and  $B$  has elements  $B_{ll'} = b_{ll'}$  defined above and is zero elsewhere.

Notice  $b_{ll'} d_l = b_{l'l} d_{l'}$ , so  $D^{-1}(I - B)$  is a symmetric matrix. Next, we show this matrix is positive definite. In the following, the notation  $l < l'$  will indicate that the location  $l$  precedes location  $l'$  in the

ordering of the vector  $\beta_L$ . For an arbitrary nonzero vector  $x$  of length  $|L|$

$$\begin{aligned}
x^T D^{-1}(I - B)x &= \sum_{l \in L} \frac{d_l}{\sigma_{\beta}^2} x_l^2 - 2 \sum_{l < l'} \frac{d_l}{\sigma_{\beta}^2} b_{ll'} x_l x_{l'} \\
&= \sum_{l \in L} \frac{d_l}{\sigma_{\beta}^2} x_l^2 + \sum_{l < l'} \frac{d_l}{\sigma_{\beta}^2} b_{ll'} (x_l^2 - 2x_l x_{l'} + x_{l'}^2) - \sum_{l < l'} \frac{d_l}{\sigma_{\beta}^2} b_{ll'} (x_l^2 + x_{l'}^2) \\
&= \sum_{l \in L} \frac{d_l}{\sigma_{\beta}^2} x_l^2 + \sum_{l < l'} \frac{d_l}{\sigma_{\beta}^2} b_{ll'} (x_l - x_{l'})^2 - \sum_{l \neq l'} \frac{d_l}{\sigma_{\beta}^2} b_{ll'} x_l^2 \\
&= \sum_{l \in L} \left[ \frac{d_l}{\sigma_{\beta}^2} \left( 1 - \sum_{\{l': l' \neq l\}} b_{ll'} \right) x_l^2 \right] + \sum_{l < l'} \frac{d_l}{\sigma_{\beta}^2} b_{ll'} (x_l - x_{l'})^2. \tag{10}
\end{aligned}$$

Because  $b_{ll'}$  is non-negative, we have  $\sum_{l < l'} \frac{d_l}{\sigma_{\beta}^2} b_{ll'} (x_l - x_{l'})^2 \geq 0$ . Moreover, for every  $l$  the term  $\sum_{\{l': l' \neq l\}} b_{ll'} = \frac{1}{d_l} \cdot |\{l' : l' \in \delta_l \cap L\}| \leq 1$ . Because we assume  $L^C$  is non-empty, there exists at least one location  $l$  such that the preceding inequality is strict. Therefore there is at least one location  $l$  for which

$$\sum_{l \in L} \left[ \frac{d_l}{\sigma_{\beta}^2} \left( 1 - \sum_{\{l': l' \neq l\}} b_{ll'} \right) x_l^2 \right] > 0$$

and thus  $x^T D^{-1}(I - B)x > 0$ . So, the matrix  $D^{-1}(I - B)$  is symmetric and positive definite, and  $[\beta_L]$  has a proper joint distribution. Finally, we note  $f(\beta|\gamma) = f(\beta_L) \prod_{l \in L^C} \delta(0)$ , which is the product of proper densities.  $\square$
